# Supplementary material for: Monomorphic genotypes within a generalist lineage of Campylobacter jejuni show signs of global dispersion
Source: PubMed Central journal article supplement (PMC5359405; doi:10.1099/mgen.0.000088), 2016-10-21
Supplement: mgen-02-88-s001.pdf [file mgen-02-88-s001.pdf]

| Isolate        | ST   | CC | Country | Year | BAPS L1 | BAPS L2 | Source | ID number<br>PubMLST | ENA<br>accession<br>number | Study                                   |
|----------------|------|----|---------|------|---------|---------|--------|----------------------|----------------------------|-----------------------------------------|
| Dataset one    |      |    |         |      |         |         |        |                      |                            |                                         |
| <b>Dg20a</b>   | 7259 | 45 | UK      | UNK  | 1       | 1       | animal | 25937                |                            | Pearson et al. (2015)                   |
| <b>Dg26b</b>   | 7259 | 45 | UK      | UNK  | 1       | 1       | animal | 25959                |                            | Pearson et al. (2015)                   |
| <b>Dg95</b>    | 7259 | 45 | UK      | UNK  | 1       | 1       | animal | 26020                |                            | Pearson et al. (2015)                   |
| <b>Dg137</b>   | 7259 | 45 | UK      | UNK  | 1       | 1       | animal | 26031                |                            | Pearson et al. (2015)                   |
| <b>Dg246</b>   | 7259 | 45 | UK      | UNK  | 1       | 1       | animal | 26063                |                            | Pearson et al. (2015)                   |
| <b>Dg63a</b>   | 7259 | 45 | UK      | UNK  | 1       | 2       | animal | 25975                |                            | Pearson et al. (2015)                   |
| <b>Dg122</b>   | 4791 | 45 | UK      | UNK  | 1       | 3       | animal | 25999                |                            | Pearson et al. (2015)                   |
| <b>Dg180</b>   | 4791 | 45 | UK      | UNK  | 1       | 3       | animal | 26034                |                            | Pearson et al. (2015)                   |
| <b>Dg184</b>   | 4791 | 45 | UK      | UNK  | 1       | 3       | animal | 26040                |                            | Pearson et al. (2015)                   |
| <b>Dg187</b>   | 4791 | 45 | UK      | UNK  | 1       | 3       | animal | 26054                |                            | Pearson et al. (2015)                   |
| <b>8623-12</b> | 583  | 45 | Finland | 2012 | 2       | 5       | animal | 47996                |                            | Llarena et al. (2015)                   |
| <b>8624-12</b> | 583  | 45 | Finland | 2012 | 2       | 5       | animal | 48011                |                            | Llarena et al. (2015)                   |
| <b>OXC4559</b> | 583  | 45 | UK      | 2009 | 2       | 5       | human  | 24039                |                            | Oxfordshire Human<br>Surveillance Study |
| <b>OXC4850</b> | 583  | 45 | UK      | 2010 | 2       | 5       | human  | 22163                |                            | Oxfordshire Human<br>Surveillance Study |
| <b>OXC6294</b> | 583  | 45 | UK      | 2011 | 2       | 5       | human  | 16091                |                            | Oxfordshire Human<br>Surveillance Study |
| <b>OXC6330</b> | 583  | 45 | UK      | 2011 | 2       | 5       | human  | 16127                |                            | Oxfordshire Human<br>Surveillance Study |
| <b>OXC6819</b> | 583  | 45 | UK      | 2012 | 2       | 5       | human  | 18376                |                            | Oxfordshire Human<br>Surveillance Study |
| <b>OXC7584</b> | 583  | 45 | UK      | 2012 | 2       | 5       | human  | 24518                |                            | Oxfordshire Human<br>Surveillance Study |
| <b>OXC7587</b> | 583  | 45 | UK      | 2013 | 2       | 5       | human  | 24521                |                            | Oxfordshire Human<br>Surveillance Study |
| <b>OXC8080</b> | 583  | 45 | UK      | 2013 | 2       | 5       | human  | 25519                |                            | Oxfordshire Human<br>Surveillance Study |
| <b>Dg24</b>    | 583  | 45 | UK      | UNK  | 2       | 5       | animal | 25944                |                            | Pearson et al. (2015)                   |
| <b>Dg25a</b>   | 583  | 45 | UK      | UNK  | 2       | 5       | animal | 25955                |                            | Pearson et al. (2015)                   |
| <b>Dg28a</b>   | 583  | 45 | UK      | UNK  | 2       | 5       | animal | 25963                |                            | Pearson et al. (2015)                   |

|                |     |    |         |      |   |   |             |       |  |                                      |
|----------------|-----|----|---------|------|---|---|-------------|-------|--|--------------------------------------|
| <b>Dg366</b>   | 583 | 45 | UK      | UNK  | 2 | 5 | animal      | 26013 |  | Pearson et al. (2015)                |
| <b>Dg260</b>   | 583 | 45 | UK      | UNK  | 2 | 5 | animal      | 26051 |  | Pearson et al. (2015)                |
| <b>OXC5091</b> | 583 | 45 | UK      | 2010 | 2 | 6 | human       | 24732 |  | Oxfordshire Human Surveillance Study |
| <b>OXC5224</b> | 583 | 45 | UK      | 2010 | 2 | 6 | human       | 24810 |  | Oxfordshire Human Surveillance Study |
| <b>OXC6970</b> | 583 | 45 | UK      | 2012 | 2 | 6 | human       | 21144 |  | Oxfordshire Human Surveillance Study |
| <b>OXC7032</b> | 583 | 45 | UK      | 2012 | 2 | 6 | human       | 22218 |  | Oxfordshire Human Surveillance Study |
| <b>OXC8128</b> | 583 | 45 | UK      | 2013 | 2 | 6 | human       | 25459 |  | Oxfordshire Human Surveillance Study |
| <b>OXC7344</b> | 334 | 45 | UK      | 2012 | 2 | 7 | human       | 23884 |  | Oxfordshire Human Surveillance Study |
| <b>OXC7346</b> | 334 | 45 | UK      | 2012 | 2 | 7 | human       | 23886 |  | Oxfordshire Human Surveillance Study |
| <b>OXC8062</b> | 334 | 45 | UK      | 2013 | 2 | 7 | human       | 25512 |  | Oxfordshire Human Surveillance Study |
| <b>OXC8055</b> | 334 | 45 | UK      | 2013 | 2 | 7 | human       | 25600 |  | Oxfordshire Human Surveillance Study |
| <b>2661-04</b> | 230 | 45 | Finland | 2004 | 2 | 4 | animal      | 48000 |  | Llarena et al. (2015)                |
| <b>5441-04</b> | 230 | 45 | Finland | 2004 | 2 | 4 | animal      | 48024 |  | Llarena et al. (2015)                |
| <b>5442-04</b> | 230 | 45 | Finland | 2004 | 2 | 4 | animal      | 48023 |  | Llarena et al. (2015)                |
| <b>2912-08</b> | 230 | 45 | Finland | 2008 | 2 | 4 | animal      | 48005 |  | Llarena et al. (2015)                |
| <b>2913-08</b> | 230 | 45 | Finland | 2008 | 2 | 4 | animal      | 48019 |  | Llarena et al. (2015)                |
| <b>J15</b>     | 230 | 45 | Finland | 2012 | 2 | 4 | human       | 46045 |  | Kovanen et al. (2014b)               |
| <b>J18</b>     | 230 | 45 | Finland | 2012 | 2 | 4 | human       | 46046 |  | Kovanen et al. (2014b)               |
| <b>J14</b>     | 230 | 45 | Finland | 2012 | 2 | 4 | human       | 46043 |  | Kovanen et al. (2014b)               |
| <b>K8</b>      | 230 | 45 | Finland | 2012 | 2 | 4 | human       | 46048 |  | Kovanen et al. (2014b)               |
| <b>K9</b>      | 230 | 45 | Finland | 2012 | 2 | 4 | human       | 46049 |  | Kovanen et al. (2014b)               |
| <b>S23-1</b>   | 230 | 45 | Finland | 2012 | 2 | 4 | environment | 46056 |  | Kovanen et al. (2016)                |
| <b>M4</b>      | 230 | 45 | Finland | 2012 | 2 | 4 | human       | 46055 |  | Kovanen et al. (2014b)               |
| <b>6175-12</b> | 230 | 45 | Finland | 2012 | 2 | 4 | animal      | 46040 |  | Llarena et al. (2015)                |
| <b>6737-12</b> | 230 | 45 | Finland | 2012 | 2 | 4 | animal      | 46042 |  | Llarena et al. (2015)                |
| <b>J16</b>     | 230 | 45 | Finland | 2012 | 2 | 4 | human       | 46044 |  | Kovanen et al. (2014b)               |

|                 |     |    |         |      |   |   |        |       |            |                                      |
|-----------------|-----|----|---------|------|---|---|--------|-------|------------|--------------------------------------|
| <b>J17</b>      | 230 | 45 | Finland | 2012 | 2 | 4 | human  | 46047 |            | Kovanen et al. (2014b)               |
| <b>K13</b>      | 230 | 45 | Finland | 2012 | 2 | 4 | human  | 46053 |            | Kovanen et al. (2014b)               |
| <b>K10</b>      | 230 | 45 | Finland | 2012 | 2 | 4 | human  | 46050 |            | Kovanen et al. (2014b)               |
| <b>K11</b>      | 230 | 45 | Finland | 2012 | 2 | 4 | human  | 46051 |            | Kovanen et al. (2014b)               |
| <b>K12</b>      | 230 | 45 | Finland | 2012 | 2 | 4 | human  | 46052 |            | Kovanen et al. (2014b)               |
| <b>K14</b>      | 230 | 45 | Finland | 2012 | 2 | 4 | human  | 46054 |            | Kovanen et al. (2014b)               |
| <b>OXC8046</b>  | 230 | 45 | UK      | 2013 | 2 | 4 | human  | 25508 |            | Oxfordshire Human Surveillance Study |
| <b>FI15</b>     | 21  | 21 | Estonia | 2012 | 3 | 8 | animal | 46132 | PRJEB15115 | This study                           |
| <b>7-1C</b>     | 45  | 45 | Finland | 1999 | 4 | 9 | animal | 46108 | PRJEB15115 | This study                           |
| <b>BRTI</b>     | 45  | 45 | Finland | 1999 | 4 | 9 | animal | 46109 | PRJEB15115 | This study                           |
| <b>UoH4028</b>  | 45  | 45 | Finland | 2003 | 4 | 9 | animal | 2681  |            | Zhang et al. (2015)                  |
| <b>3721-04</b>  | 45  | 45 | Finland | 2004 | 4 | 9 | animal | 48017 |            | Llarena et al. (2015)                |
| <b>2445-08</b>  | 45  | 45 | Finland | 2008 | 4 | 9 | animal | 48012 |            | Llarena et al. (2015)                |
| <b>3222-08</b>  | 45  | 45 | Finland | 2008 | 4 | 9 | animal | 48006 |            | Llarena et al. (2015)                |
| <b>11962-12</b> | 45  | 45 | Finland | 2012 | 4 | 9 | animal | 46014 |            | Llarena et al. (2015)                |
| <b>5894-12</b>  | 45  | 45 | Finland | 2012 | 4 | 9 | animal | 45986 |            | Llarena et al. (2015)                |
| <b>5913-12</b>  | 45  | 45 | Finland | 2012 | 4 | 9 | animal | 45987 |            | Llarena et al. (2015)                |
| <b>6390-12</b>  | 45  | 45 | Finland | 2012 | 4 | 9 | animal | 45995 |            | Llarena et al. (2015)                |
| <b>6391-12</b>  | 45  | 45 | Finland | 2012 | 4 | 9 | animal | 45996 |            | Llarena et al. (2015)                |
| <b>6392-12</b>  | 45  | 45 | Finland | 2012 | 4 | 9 | animal | 45997 |            | Llarena et al. (2015)                |
| <b>6393-12</b>  | 45  | 45 | Finland | 2012 | 4 | 9 | animal | 45998 |            | Llarena et al. (2015)                |
| <b>6395-12</b>  | 45  | 45 | Finland | 2012 | 4 | 9 | animal | 45999 |            | Llarena et al. (2015)                |
| <b>6544-12</b>  | 45  | 45 | Finland | 2012 | 4 | 9 | animal | 46006 |            | Llarena et al. (2015)                |
| <b>6545-12</b>  | 45  | 45 | Finland | 2012 | 4 | 9 | animal | 46007 |            | Llarena et al. (2015)                |
| <b>6546-12</b>  | 45  | 45 | Finland | 2012 | 4 | 9 | animal | 46008 |            | Llarena et al. (2015)                |
| <b>J6</b>       | 45  | 45 | Finland | 2012 | 4 | 9 | human  | 46019 |            | Kovanen et al. (2014b)               |
| <b>J9</b>       | 45  | 45 | Finland | 2012 | 4 | 9 | human  | 46022 |            | Kovanen et al. (2014b)               |
| <b>J12</b>      | 45  | 45 | Finland | 2012 | 4 | 9 | human  | 46025 |            | Kovanen et al. (2014b)               |
| <b>J4</b>       | 45  | 45 | Finland | 2012 | 4 | 9 | human  | 46017 |            | Kovanen et al. (2014b)               |
| <b>J10</b>      | 45  | 45 | Finland | 2012 | 4 | 9 | human  | 46023 |            | Kovanen et al. (2014b)               |

|                |    |    |           |      |   |    |             |       |            |                                      |
|----------------|----|----|-----------|------|---|----|-------------|-------|------------|--------------------------------------|
| <b>J7</b>      | 45 | 45 | Finland   | 2012 | 4 | 9  | human       | 46020 |            | Kovanen et al. (2014b)               |
| <b>J5</b>      | 45 | 45 | Finland   | 2012 | 4 | 9  | human       | 46018 |            | Kovanen et al. (2014b)               |
| <b>J2</b>      | 45 | 45 | Finland   | 2012 | 4 | 9  | human       | 46015 |            | Kovanen et al. (2014b)               |
| <b>J13</b>     | 45 | 45 | Finland   | 2012 | 4 | 9  | human       | 46026 |            | Kovanen et al. (2014b)               |
| <b>J3</b>      | 45 | 45 | Finland   | 2012 | 4 | 9  | human       | 46016 |            | Kovanen et al. (2014b)               |
| <b>K1</b>      | 45 | 45 | Finland   | 2012 | 4 | 9  | human       | 46027 |            | Kovanen et al. (2014b)               |
| <b>OXC4893</b> | 45 | 45 | UK        | 2010 | 4 | 9  | human       | 24459 |            | Oxfordshire Human Surveillance Study |
| <b>OXC6321</b> | 45 | 45 | UK        | 2011 | 4 | 9  | human       | 16118 |            | Oxfordshire Human Surveillance Study |
| <b>OXC6536</b> | 45 | 45 | UK        | 2011 | 4 | 9  | human       | 16328 |            | Oxfordshire Human Surveillance Study |
| <b>OXC6797</b> | 45 | 45 | UK        | 2012 | 4 | 9  | human       | 18354 |            | Oxfordshire Human Surveillance Study |
| <b>OXC7129</b> | 45 | 45 | UK        | 2012 | 4 | 9  | human       | 21210 |            | Oxfordshire Human Surveillance Study |
| <b>OXC7284</b> | 45 | 45 | UK        | 2012 | 4 | 9  | human       | 22325 |            | Oxfordshire Human Surveillance Study |
| <b>OXC7745</b> | 45 | 45 | UK        | 2013 | 4 | 9  | human       | 24980 |            | Oxfordshire Human Surveillance Study |
| <b>OXC8238</b> | 45 | 45 | UK        | 2013 | 4 | 9  |             | 27939 |            | Oxfordshire Human Surveillance Study |
| <b>OXC7216</b> | 45 | 45 | UK        | 2012 | 4 | 9  | human       | 22707 |            | Oxfordshire Human Surveillance Study |
| <b>OXC7233</b> | 45 | 45 | UK        | 2012 | 4 | 9  | human       | 22723 |            | Oxfordshire Human Surveillance Study |
| <b>K6</b>      | 45 | 45 | Finland   | 2012 | 4 | 10 | human       | 46032 |            | Kovanen et al. (2014b)               |
| <b>S28-1</b>   | 45 | 45 | Finland   | 2012 | 4 | 10 | environment | 46038 |            | Kovanen et al. (2016)                |
| <b>FI25</b>    | 45 | 45 | Estonia   | 2012 | 4 | 11 | animal      | 46137 | PRJEB15115 | This study                           |
| <b>K4</b>      | 45 | 45 | Finland   | 2012 | 4 | 12 | human       | 46030 |            | Kovanen et al. (2014b)               |
| <b>FI39</b>    | 45 | 45 | Lithuania | 2012 | 5 | 13 | animal      | 46135 | PRJEB15115 | This study                           |
| <b>3485-08</b> | 45 | 45 | Finland   | 2008 | 5 | 15 | animal      | 47999 |            | Llarena et al. (2015)                |
| <b>M3</b>      | 45 | 45 | Finland   | 2012 | 5 | 15 | human       | 46035 |            | Kovanen et al. (2014b)               |
| <b>5760-12</b> | 45 | 45 | Finland   | 2012 | 5 | 15 | animal      | 45983 |            | Llarena et al. (2015)                |
| <b>5761-12</b> | 45 | 45 | Finland   | 2012 | 5 | 15 | animal      | 45984 |            | Llarena et al. (2015)                |

|                     |    |    |         |      |   |    |             |       |  |                                      |
|---------------------|----|----|---------|------|---|----|-------------|-------|--|--------------------------------------|
| <b>5762-12</b>      | 45 | 45 | Finland | 2012 | 5 | 15 | animal      | 45985 |  | Llarena et al. (2015)                |
| <b>6179-12</b>      | 45 | 45 | Finland | 2012 | 5 | 15 | animal      | 45989 |  | Llarena et al. (2015)                |
| <b>J11</b>          | 45 | 45 | Finland | 2012 | 5 | 15 | human       | 46024 |  | Kovanen et al. (2014b)               |
| <b>S17-1</b>        | 45 | 45 | Finland | 2012 | 5 | 15 | environment | 46037 |  | Kovanen et al. (2016)                |
| <b>OXC5420</b>      | 45 | 45 | UK      | 2010 | 5 | 15 | human       | 21372 |  | Oxfordshire Human Surveillance Study |
| <b>OXC6437</b>      | 45 | 45 | UK      | 2011 | 5 | 15 | human       | 16232 |  | Oxfordshire Human Surveillance Study |
| <b>OXC7061</b>      | 45 | 45 | UK      | 2012 | 5 | 15 | human       | 22245 |  | Oxfordshire Human Surveillance Study |
| <b>OXC7267</b>      | 45 | 45 | UK      | 2012 | 5 | 15 | human       | 22308 |  | Oxfordshire Human Surveillance Study |
| <b>OXC7186</b>      | 45 | 45 | UK      | 2012 | 5 | 15 | human       | 22677 |  | Oxfordshire Human Surveillance Study |
| <b>OXC7484</b>      | 45 | 45 | UK      | 2012 | 5 | 15 | human       | 24012 |  | Oxfordshire Human Surveillance Study |
| <b>OXC7793</b>      | 45 | 45 | UK      | 2013 | 5 | 15 | human       | 24596 |  | Oxfordshire Human Surveillance Study |
| <b>OXC7735</b>      | 45 | 45 | UK      | 2013 | 5 | 15 | human       | 24973 |  | Oxfordshire Human Surveillance Study |
| <b>OXC8065</b>      | 45 | 45 | UK      | 2013 | 5 | 15 | human       | 25515 |  | Oxfordshire Human Surveillance Study |
| <b>OXC8228</b>      | 45 | 45 | UK      | 2013 | 5 | 15 |             | 27930 |  | Oxfordshire Human Surveillance Study |
| <b>Dg145</b>        | 45 | 45 | UK      | UNK  | 5 | 15 | animal      | 24193 |  | Pearson et al. (2015)                |
| <b>Dg162</b>        | 45 | 45 | UK      | UNK  | 5 | 15 | animal      | 26024 |  | Pearson et al. (2015)                |
| <b>Dg282_R</b>      | 45 | 45 | UK      | UNK  | 5 | 15 | animal      | 28057 |  | Pearson et al. (2015)                |
| <b>S16-1</b>        | 45 | 45 | Finland | 2012 | 5 | 16 | environment | 46036 |  | Kovanen et al. (2016)                |
| <b>OXC5180</b>      | 45 | 45 | UK      | 2010 | 5 | 14 | human       | 24777 |  | Oxfordshire Human Surveillance Study |
| <b>OXC8072</b>      | 45 | 45 | UK      | 2013 | 5 | 14 | human       | 25606 |  | Oxfordshire Human Surveillance Study |
| <b>OXC7708</b>      | 45 | 45 | UK      | 2013 | 5 | 14 | human       | 25629 |  | Oxfordshire Human Surveillance Study |
| <b>UoHIHV116260</b> | 45 | 45 | Finland | 2000 | 6 | 17 | human       | 2693  |  | Revez et al. (2014)                  |
| <b>3455-04</b>      | 45 | 45 | Finland | 2004 | 6 | 17 | animal      | 48021 |  | Llarena et al. (2015)                |
| <b>3461-04</b>      | 45 | 45 | Finland | 2004 | 6 | 17 | animal      | 48013 |  | Llarena et al. (2015)                |

|                 |    |    |         |      |   |    |        |       |            |                                      |
|-----------------|----|----|---------|------|---|----|--------|-------|------------|--------------------------------------|
| <b>3578-04</b>  | 45 | 45 | Finland | 2004 | 6 | 17 | animal | 48030 |            | Llarena et al. (2015)                |
| <b>49-8S</b>    | 45 | 45 | Finland | 2004 | 6 | 17 | animal | 46110 | PRJEB15115 | This study                           |
| <b>49-9S</b>    | 45 | 45 | Finland | 2004 | 6 | 17 | animal | 46111 | PRJEB15115 | This study                           |
| <b>3976-08</b>  | 45 | 45 | Finland | 2008 | 6 | 17 | animal | 48010 |            | Llarena et al. (2015)                |
| <b>3977-08</b>  | 45 | 45 | Finland | 2008 | 6 | 17 | animal | 48002 |            | Llarena et al. (2015)                |
| <b>3978-08</b>  | 45 | 45 | Finland | 2008 | 6 | 17 | animal | 48016 |            | Llarena et al. (2015)                |
| <b>3979-08</b>  | 45 | 45 | Finland | 2008 | 6 | 17 | animal | 48027 |            | Llarena et al. (2015)                |
| <b>3980-08</b>  | 45 | 45 | Finland | 2008 | 6 | 17 | animal | 48003 |            | Llarena et al. (2015)                |
| <b>4080-08</b>  | 45 | 45 | Finland | 2008 | 6 | 17 | animal | 46013 |            | Llarena et al. (2015)                |
| <b>10515-12</b> | 45 | 45 | Finland | 2012 | 6 | 17 | animal | 46013 |            | Llarena et al. (2015)                |
| <b>3488-12</b>  | 45 | 45 | Finland | 2012 | 6 | 17 | animal | 45982 |            | Llarena et al. (2015)                |
| <b>6236-12</b>  | 45 | 45 | Finland | 2012 | 6 | 17 | animal | 45991 |            | Llarena et al. (2015)                |
| <b>6237-12</b>  | 45 | 45 | Finland | 2012 | 6 | 17 | animal | 45992 |            | Llarena et al. (2015)                |
| <b>6497-12</b>  | 45 | 45 | Finland | 2012 | 6 | 17 | animal | 46000 |            | Llarena et al. (2015)                |
| <b>6498-12</b>  | 45 | 45 | Finland | 2012 | 6 | 17 | animal | 46001 |            | Llarena et al. (2015)                |
| <b>6538-12</b>  | 45 | 45 | Finland | 2012 | 6 | 17 | animal | 46002 |            | Llarena et al. (2015)                |
| <b>6541-12</b>  | 45 | 45 | Finland | 2012 | 6 | 17 | animal | 46004 |            | Llarena et al. (2015)                |
| <b>6614-12</b>  | 45 | 45 | Finland | 2012 | 6 | 17 | animal | 46009 |            | Llarena et al. (2015)                |
| <b>J8</b>       | 45 | 45 | Finland | 2012 | 6 | 17 | human  | 46021 |            | Kovanen et al. (2014b)               |
| <b>K3</b>       | 45 | 45 | Finland | 2012 | 6 | 17 | human  | 46029 |            | Kovanen et al. (2014b)               |
| <b>OXC5171</b>  | 45 | 45 | UK      | 2010 | 6 | 17 | human  | 24772 |            | Oxfordshire Human Surveillance Study |
| <b>OXC5225</b>  | 45 | 45 | UK      | 2010 | 6 | 17 | human  | 24811 |            | Oxfordshire Human Surveillance Study |
| <b>OXC5231</b>  | 45 | 45 | UK      | 2010 | 6 | 17 | human  | 24817 |            | Oxfordshire Human Surveillance Study |
| <b>OXC5236</b>  | 45 | 45 | UK      | 2010 | 6 | 17 | human  | 24819 |            | Oxfordshire Human Surveillance Study |
| <b>OXC6259</b>  | 45 | 45 | UK      | 2011 | 6 | 17 | human  | 16056 |            | Oxfordshire Human Surveillance Study |
| <b>OXC6278</b>  | 45 | 45 | UK      | 2011 | 6 | 17 | human  | 16075 |            | Oxfordshire Human Surveillance Study |
| <b>OXC6313</b>  | 45 | 45 | UK      | 2011 | 6 | 17 | human  | 16110 |            | Oxfordshire Human Surveillance Study |

|                |      |    |         |      |   |    |        |       |  |                                      |
|----------------|------|----|---------|------|---|----|--------|-------|--|--------------------------------------|
| <b>OXC6339</b> | 45   | 45 | UK      | 2011 | 6 | 17 | human  | 16136 |  | Oxfordshire Human Surveillance Study |
| <b>OXC5850</b> | 45   | 45 | UK      | 2011 | 6 | 17 | human  | 23667 |  | Oxfordshire Human Surveillance Study |
| <b>OXC6894</b> | 45   | 45 | UK      | 2012 | 6 | 17 | human  | 22089 |  | Oxfordshire Human Surveillance Study |
| <b>OXC7014</b> | 45   | 45 | UK      | 2012 | 6 | 17 | human  | 22201 |  | Oxfordshire Human Surveillance Study |
| <b>OXC7018</b> | 45   | 45 | UK      | 2012 | 6 | 17 | human  | 22205 |  | Oxfordshire Human Surveillance Study |
| <b>OXC7025</b> | 45   | 45 | UK      | 2012 | 6 | 17 | human  | 22212 |  | Oxfordshire Human Surveillance Study |
| <b>OXC7074</b> | 45   | 45 | UK      | 2012 | 6 | 17 | human  | 22258 |  | Oxfordshire Human Surveillance Study |
| <b>OXC7090</b> | 45   | 45 | UK      | 2012 | 6 | 17 | human  | 22272 |  | Oxfordshire Human Surveillance Study |
| <b>OXC7099</b> | 45   | 45 | UK      | 2012 | 6 | 17 | human  | 22281 |  | Oxfordshire Human Surveillance Study |
| <b>OXC7315</b> | 45   | 45 | UK      | 2012 | 6 | 17 | human  | 22356 |  | Oxfordshire Human Surveillance Study |
| <b>OXC7634</b> | 45   | 45 | UK      | 2013 | 6 | 17 | human  | 24563 |  | Oxfordshire Human Surveillance Study |
| <b>OXC7766</b> | 45   | 45 | UK      | 2013 | 6 | 17 | human  | 24575 |  | Oxfordshire Human Surveillance Study |
| <b>OXC7776</b> | 45   | 45 | UK      | 2013 | 6 | 17 | human  | 24583 |  | Oxfordshire Human Surveillance Study |
| <b>OXC7911</b> | 45   | 45 | UK      | 2013 | 6 | 17 | human  | 25041 |  | Oxfordshire Human Surveillance Study |
| <b>OXC8007</b> | 45   | 45 | UK      | 2013 | 6 | 17 | human  | 25491 |  | Oxfordshire Human Surveillance Study |
| <b>OXC8195</b> | 45   | 45 | UK      | 2013 | 6 | 17 |        | 27900 |  | Oxfordshire Human Surveillance Study |
| <b>OXC8362</b> | 45   | 45 | UK      | 2013 | 6 | 17 |        | 28050 |  | Oxfordshire Human Surveillance Study |
| <b>OXC7225</b> | 45   | 45 | UK      | UNK  | 6 | 17 | human  | 22716 |  | Oxfordshire Human Surveillance Study |
| <b>OXC7239</b> | 45   | 45 | UK      | UNK  | 6 | 17 | human  | 22729 |  | Oxfordshire Human Surveillance Study |
| <b>Dg273</b>   | 45   | 45 | UK      | UNK  | 6 | 17 | animal | 26038 |  | Pearson et al. (2015)                |
| <b>6098-04</b> | 7008 | 45 | Finland | 2004 | 6 | 17 | animal | 48008 |  | Llarena et al. (2015)                |

|                    |    |    |           |      |   |    |        |       |            |                                      |
|--------------------|----|----|-----------|------|---|----|--------|-------|------------|--------------------------------------|
| <b>FI44</b>        | 45 | 45 | Lithuania | 2012 | 6 | 18 | animal | 46136 | PRJEB15115 | This study                           |
| <b>LS37125S</b>    | 45 | 45 | Finland   | 2004 | 6 | 19 | animal | 46112 | PRJEB15115 | This study                           |
| <b>K2</b>          | 45 | 45 | Finland   | 2012 | 6 | 19 | human  | 46028 |            | Kovanen et al. (2014b)               |
| <b>K5</b>          | 45 | 45 | Finland   | 2012 | 6 | 19 | human  | 46031 |            | Kovanen et al. (2014b)               |
| <b>UoH540</b>      | 45 | 45 | Finland   | 2001 | 6 | 17 | human  | 2695  |            | Zhang et al. (2015)                  |
| <b>71712-Vihti</b> | 45 | 45 | Finland   | 2001 | 6 | 17 | human  | 48018 |            | Zhang et al. (2015)                  |
| <b>2719-04</b>     | 45 | 45 | Finland   | 2004 | 6 | 17 | animal | 47998 |            | Llarena et al. (2015)                |
| <b>3452-04</b>     | 45 | 45 | Finland   | 2004 | 6 | 17 | animal | 48025 |            | Llarena et al. (2015)                |
| <b>5280-04</b>     | 45 | 45 | Finland   | 2004 | 6 | 17 | animal | 48020 |            | Llarena et al. (2015)                |
| <b>6288-04</b>     | 45 | 45 | Finland   | 2004 | 6 | 17 | animal | 48015 |            | Llarena et al. (2015)                |
| <b>6934-04</b>     | 45 | 45 | Finland   | 2004 | 6 | 17 | animal | 48029 |            | Llarena et al. (2015)                |
| <b>3960-08</b>     | 45 | 45 | Finland   | 2008 | 6 | 17 | animal | 46012 |            | Llarena et al. (2015)                |
| <b>10031-12</b>    | 45 | 45 | Finland   | 2012 | 6 | 17 | animal | 46012 |            | Llarena et al. (2015)                |
| <b>1994-12</b>     | 45 | 45 | Finland   | 2012 | 6 | 17 | animal | 45980 |            | Llarena et al. (2015)                |
| <b>1995-12</b>     | 45 | 45 | Finland   | 2012 | 6 | 17 | animal | 45981 |            | Llarena et al. (2015)                |
| <b>6190-12</b>     | 45 | 45 | Finland   | 2012 | 6 | 17 | animal | 45990 |            | Llarena et al. (2015)                |
| <b>6241-12</b>     | 45 | 45 | Finland   | 2012 | 6 | 17 | animal | 45993 |            | Llarena et al. (2015)                |
| <b>6242-12</b>     | 45 | 45 | Finland   | 2012 | 6 | 17 | animal | 45994 |            | Llarena et al. (2015)                |
| <b>6540-12</b>     | 45 | 45 | Finland   | 2012 | 6 | 17 | animal | 46003 |            | Llarena et al. (2015)                |
| <b>6543-12</b>     | 45 | 45 | Finland   | 2012 | 6 | 17 | animal | 46005 |            | Llarena et al. (2015)                |
| <b>9814-12</b>     | 45 | 45 | Finland   | 2012 | 6 | 17 | animal | 46011 |            | Llarena et al. (2015)                |
| <b>OXC7369</b>     | 45 | 45 | UK        | 2012 | 6 | 17 | human  | 23907 |            | Oxfordshire Human Surveillance Study |
| <b>OXC7659</b>     | 45 | 45 | UK        | 2012 | 6 | 17 | human  | 24914 |            | Oxfordshire Human Surveillance Study |
| <b>OXC7922</b>     | 45 | 45 | UK        | 2013 | 6 | 17 | human  | 25051 |            | Oxfordshire Human Surveillance Study |
| <b>OXC7923</b>     | 45 | 45 | UK        | 2013 | 6 | 17 | human  | 25052 |            | Oxfordshire Human Surveillance Study |
| <b>OXC7972</b>     | 45 | 45 | UK        | 2013 | 6 | 17 | human  | 25387 |            | Oxfordshire Human Surveillance Study |
| <b>Dg292</b>       | 45 | 45 | UK        | UNK  | 6 | 17 | animal | 25964 |            | Pearson et al. (2015)                |



|                |      |    |         |      |   |    |             |       |  |                                      |
|----------------|------|----|---------|------|---|----|-------------|-------|--|--------------------------------------|
| <b>Dg200</b>   | 45   | 45 | UK      | UNK  | 6 | 17 | animal      | 25985 |  | Pearson et al. (2015)                |
| <b>Dg206</b>   | 45   | 45 | UK      | UNK  | 6 | 17 | animal      | 26018 |  | Pearson et al. (2015)                |
| <b>Dg202</b>   | 45   | 45 | UK      | UNK  | 6 | 17 | animal      | 26026 |  | Pearson et al. (2015)                |
| <b>Dg383</b>   | 45   | 45 | UK      | UNK  | 6 | 17 | animal      | 26062 |  | Pearson et al. (2015)                |
| <b>VJA6</b>    | 45   | 45 | Finland | 2012 | 6 | 19 | environment | 46039 |  | Kovanen et al. (2016)                |
| <b>OXC6803</b> | 45   | 45 | UK      | 2012 | 7 | 24 | human       | 18360 |  | Oxfordshire Human Surveillance Study |
| <b>3458-04</b> | 45   | 45 | Finland | 2004 | 7 | 21 | animal      | 48009 |  | Llarena et al. (2015)                |
| <b>5095-04</b> | 45   | 45 | Finland | 2004 | 7 | 21 | animal      |       |  | Llarena et al. (2015)                |
| <b>5096-04</b> | 45   | 45 | Finland | 2004 | 7 | 21 | animal      | 48028 |  | Llarena et al. (2015)                |
| <b>OXC5192</b> | 45   | 45 | UK      | 2010 | 7 | 21 | human       | 24787 |  | Oxfordshire Human Surveillance Study |
| <b>OXC7103</b> | 45   | 45 | UK      | 2012 | 7 | 21 | human       | 21185 |  | Oxfordshire Human Surveillance Study |
| <b>OXC7326</b> | 45   | 45 | UK      | 2012 | 7 | 21 | human       | 22365 |  | Oxfordshire Human Surveillance Study |
| <b>OXC8026</b> | 45   | 45 | UK      | 2013 | 7 | 21 | human       | 25589 |  | Oxfordshire Human Surveillance Study |
| <b>OXC8336</b> | 45   | 45 | UK      | 2013 | 7 | 21 |             | 28027 |  | Oxfordshire Human Surveillance Study |
| <b>OXC4736</b> | 1326 | 45 | UK      | 2009 | 7 | 21 | human       | 18439 |  | Oxfordshire Human Surveillance Study |
| <b>Dg283</b>   | 1326 | 45 | UK      | UNK  | 7 | 21 | animal      | 25960 |  | Pearson et al. (2015)                |
| <b>3976-04</b> | 45   | 45 | Finland | 2004 | 7 | 20 | animal      | 48007 |  | Llarena et al. (2015)                |
| <b>5440-04</b> | 45   | 45 | Finland | 2004 | 7 | 20 | animal      | 47997 |  | Llarena et al. (2015)                |
| <b>OXC5332</b> | 45   | 45 | UK      | 2010 | 7 | 20 | human       | 21316 |  | Oxfordshire Human Surveillance Study |
| <b>OXC6419</b> | 45   | 45 | UK      | 2011 | 7 | 20 | human       | 16214 |  | Oxfordshire Human Surveillance Study |
| <b>OXC6624</b> | 45   | 45 | UK      | 2011 | 7 | 20 | human       | 16373 |  | Oxfordshire Human Surveillance Study |
| <b>OXC6916</b> | 45   | 45 | UK      | 2012 | 7 | 20 | human       | 22111 |  | Oxfordshire Human Surveillance Study |
| <b>OXC7401</b> | 45   | 45 | UK      | 2012 | 7 | 20 | human       | 23937 |  | Oxfordshire Human Surveillance Study |
| <b>OXC7813</b> | 45   | 45 | UK      | 2013 | 7 | 20 | human       | 24611 |  | Oxfordshire Human Surveillance Study |

|                |      |    |         |      |   |    |        |       |  |                                      |
|----------------|------|----|---------|------|---|----|--------|-------|--|--------------------------------------|
| <b>OXC7235</b> | 45   | 45 | UK      | UNK  | 7 | 20 | human  | 22725 |  | Oxfordshire Human Surveillance Study |
| <b>3315-08</b> | 45   | 45 | Finland | 2008 | 7 | 22 | animal | 48004 |  | Llarena et al. (2015)                |
| <b>OXC7275</b> | 45   | 45 | UK      | 2012 | 7 | 22 | human  | 22316 |  | Oxfordshire Human Surveillance Study |
| <b>OXC7309</b> | 45   | 45 | UK      | 2012 | 7 | 22 | human  | 22350 |  | Oxfordshire Human Surveillance Study |
| <b>OXC7340</b> | 45   | 45 | UK      | 2012 | 7 | 22 | human  | 22377 |  | Oxfordshire Human Surveillance Study |
| <b>OXC7179</b> | 45   | 45 | UK      | 2012 | 7 | 22 | human  | 22670 |  | Oxfordshire Human Surveillance Study |
| <b>OXC8267</b> | 45   | 45 | UK      | 2013 | 7 | 22 |        | 27961 |  | Oxfordshire Human Surveillance Study |
| <b>OXC7975</b> | 1701 | 45 | UK      | 2013 | 7 | 22 | human  | 25390 |  | Oxfordshire Human Surveillance Study |
| <b>OXC7987</b> | 2197 | 45 | UK      | 2013 | 7 | 22 | human  | 25399 |  | Oxfordshire Human Surveillance Study |
| <b>OXC6895</b> | 45   | 45 | UK      | 2012 | 7 | 21 | human  | 22090 |  | Oxfordshire Human Surveillance Study |
| <b>OXC6896</b> | 45   | 45 | UK      | 2012 | 7 | 21 | human  | 22091 |  | Oxfordshire Human Surveillance Study |
| <b>OXC7303</b> | 45   | 45 | UK      | 2012 | 7 | 21 | human  | 22344 |  | Oxfordshire Human Surveillance Study |
| <b>OXC7185</b> | 45   | 45 | UK      | 2012 | 7 | 21 | human  | 22676 |  | Oxfordshire Human Surveillance Study |
| <b>OXC7342</b> | 45   | 45 | UK      | 2012 | 7 | 21 | human  | 23883 |  | Oxfordshire Human Surveillance Study |
| <b>OXC7496</b> | 45   | 45 | UK      | 2012 | 7 | 21 | human  | 24024 |  | Oxfordshire Human Surveillance Study |
| <b>OXC7167</b> | 6886 | 45 | UK      | 2012 | 7 | 21 | human  | 21248 |  | Oxfordshire Human Surveillance Study |
| <b>OXC7102</b> | 25   | 45 | UK      | 2012 | 7 | 23 | human  | 21184 |  | Oxfordshire Human Surveillance Study |
| <b>OXC5941</b> | 45   | 45 | UK      | 2011 | 7 | 23 | human  | 23683 |  | Oxfordshire Human Surveillance Study |
| <b>OXC6358</b> | 233  | 45 | UK      | 2011 | 7 | 23 | human  | 16155 |  | Oxfordshire Human Surveillance Study |
| <b>OXC6614</b> | 233  | 45 | UK      | 2011 | 7 | 23 | human  | 16364 |  | Oxfordshire Human Surveillance Study |

|                |      |    |    |      |   |    |        |       |  |                                      |
|----------------|------|----|----|------|---|----|--------|-------|--|--------------------------------------|
| <b>OXC6515</b> | 845  | 45 | UK | 2011 | 7 | 23 | human  | 16307 |  | Oxfordshire Human Surveillance Study |
| <b>OXC6293</b> | 45   | 45 | UK | 2011 | 7 | 24 | human  | 16090 |  | Oxfordshire Human Surveillance Study |
| <b>OXC6365</b> | 45   | 45 | UK | 2011 | 7 | 24 | human  | 16148 |  | Oxfordshire Human Surveillance Study |
| <b>OXC6365</b> | 45   | 45 | UK | 2011 | 7 | 24 | human  | 16162 |  | Oxfordshire Human Surveillance Study |
| <b>OXC8207</b> | 45   | 45 | UK | 2013 | 7 | 24 |        | 27912 |  | Oxfordshire Human Surveillance Study |
| <b>OXC8213</b> | 45   | 45 | UK | 2013 | 7 | 24 |        | 27916 |  | Oxfordshire Human Surveillance Study |
| <b>Dg44a</b>   | 7259 | 45 | UK | UNK  | 8 | 25 | animal | 25950 |  | Pearson et al. (2015)                |
| <b>Dg224</b>   | 7259 | 45 | UK | UNK  | 8 | 25 | animal | 25989 |  | Pearson et al. (2015)                |
| <b>Dg307</b>   | 7259 | 45 | UK | UNK  | 8 | 25 | animal | 25990 |  | Pearson et al. (2015)                |
| <b>Dg304</b>   | 7259 | 45 | UK | UNK  | 8 | 25 | animal | 25991 |  | Pearson et al. (2015)                |
| <b>Dg128</b>   | 7259 | 45 | UK | UNK  | 8 | 25 | animal | 26007 |  | Pearson et al. (2015)                |
| <b>Dg275</b>   | 7259 | 45 | UK | UNK  | 8 | 25 | animal | 26058 |  | Pearson et al. (2015)                |
| <b>Dg117</b>   | 7259 | 45 | UK | UNK  | 8 | 25 | animal | 26064 |  | Pearson et al. (2015)                |
| <b>Dg57a</b>   | 7259 | 45 | UK | UNK  | 8 | 26 | animal | 25947 |  | Pearson et al. (2015)                |
| <b>Dg109</b>   | 7259 | 45 | UK | UNK  | 8 | 26 | animal | 26019 |  | Pearson et al. (2015)                |
| <b>Dg104</b>   | 7259 | 45 | UK | UNK  | 8 | 26 | animal | 26043 |  | Pearson et al. (2015)                |
| <b>Dg131</b>   | 7259 | 45 | UK | UNK  | 8 | 27 | animal | 25988 |  | Pearson et al. (2015)                |
| <b>Dg130</b>   | 7259 | 45 | UK | UNK  | 8 | 27 | animal | 26015 |  | Pearson et al. (2015)                |
| <b>OXC4721</b> | 137  | 45 | UK | 2009 | 9 | 28 | human  | 18430 |  | Oxfordshire Human Surveillance Study |
| <b>OXC5331</b> | 137  | 45 | UK | 2010 | 9 | 28 | human  | 21315 |  | Oxfordshire Human Surveillance Study |
| <b>OXC5434</b> | 137  | 45 | UK | 2010 | 9 | 28 | human  | 21380 |  | Oxfordshire Human Surveillance Study |
| <b>OXC5744</b> | 137  | 45 | UK | 2010 | 9 | 28 | human  | 21471 |  | Oxfordshire Human Surveillance Study |
| <b>OXC4907</b> | 137  | 45 | UK | 2010 | 9 | 28 | human  | 24467 |  | Oxfordshire Human Surveillance Study |
| <b>OXC5318</b> | 137  | 45 | UK | 2010 | 9 | 28 |        | 25100 |  | Oxfordshire Human Surveillance Study |

|                  |      |    |    |      |   |    |       |                              |  |                                      |
|------------------|------|----|----|------|---|----|-------|------------------------------|--|--------------------------------------|
| <b>OXC6448</b>   | 137  | 45 | UK | 2011 | 9 | 28 | human | 16241                        |  | Oxfordshire Human Surveillance Study |
| <b>OXC7067</b>   | 137  | 45 | UK | 2012 | 9 | 28 | human | 22251                        |  | Oxfordshire Human Surveillance Study |
| <b>OXC7249</b>   | 137  | 45 | UK | 2012 | 9 | 28 | human | 22291                        |  | Oxfordshire Human Surveillance Study |
| <b>OXC7281</b>   | 137  | 45 | UK | 2012 | 9 | 28 | human | 22322                        |  | Oxfordshire Human Surveillance Study |
| <b>OXC7283</b>   | 137  | 45 | UK | 2012 | 9 | 28 | human | 22324                        |  | Oxfordshire Human Surveillance Study |
| <b>OXC7170</b>   | 137  | 45 | UK | 2012 | 9 | 28 | human | 22661                        |  | Oxfordshire Human Surveillance Study |
| <b>OXC7425</b>   | 137  | 45 | UK | 2012 | 9 | 28 | human | 23959                        |  | Oxfordshire Human Surveillance Study |
| <b>OXC7786</b>   | 137  | 45 | UK | 2013 | 9 | 28 | human | 24590                        |  | Oxfordshire Human Surveillance Study |
| <b>OXC7979</b>   | 137  | 45 | UK | 2013 | 9 | 28 | human | 25394                        |  | Oxfordshire Human Surveillance Study |
| <b>OXC8118</b>   | 137  | 45 | UK | 2013 | 9 | 28 | human | 25433                        |  | Oxfordshire Human Surveillance Study |
| <b>OXC8016</b>   | 137  | 45 | UK | 2013 | 9 | 28 | human | 25493                        |  | Oxfordshire Human Surveillance Study |
| <b>OXC8246</b>   | 137  | 45 | UK | 2013 | 9 | 28 |       | 27945                        |  | Oxfordshire Human Surveillance Study |
| <b>OXC5208</b>   | 6017 | 45 | UK | 2010 | 9 | 28 | human | 24798                        |  | Oxfordshire Human Surveillance Study |
| <b>NC-017280</b> | 137  | 45 | UK | 2000 | 9 | 30 | human | GCA_000148705.1<br>(GenBank) |  | Friis et al (2010)                   |
| <b>OXC7881</b>   | 137  | 45 | UK | 2013 | 9 | 32 | human | 25014                        |  | Oxfordshire Human Surveillance Study |
| <b>OXC5343</b>   | 2109 | 45 | UK | 2010 | 9 | 31 | human | 21325                        |  | Oxfordshire Human Surveillance Study |
| <b>OXC6938</b>   | 2109 | 45 | UK | 2012 | 9 | 31 | human | 21112                        |  | Oxfordshire Human Surveillance Study |
| <b>OXC7371</b>   | 2109 | 45 | UK | 2012 | 9 | 31 | human | 23909                        |  | Oxfordshire Human Surveillance Study |
| <b>OXC7376</b>   | 2109 | 45 | UK | 2012 | 9 | 31 | human | 23914                        |  | Oxfordshire Human Surveillance Study |
| <b>OXC7377</b>   | 2109 | 45 | UK | 2012 | 9 | 31 | human | 23915                        |  | Oxfordshire Human Surveillance Study |

|                |      |    |         |      |    |    |        |       |            |                                      |
|----------------|------|----|---------|------|----|----|--------|-------|------------|--------------------------------------|
| <b>OXC8372</b> | 2109 | 45 | UK      | 2013 | 9  | 31 |        | 27872 |            | Oxfordshire Human Surveillance Study |
| <b>OXC8375</b> | 2109 | 45 | UK      | 2013 | 9  | 31 |        | 27875 |            | Oxfordshire Human Surveillance Study |
| <b>OXC6592</b> | 137  | 45 | UK      | 2011 | 9  | 29 | human  | 16343 |            | Oxfordshire Human Surveillance Study |
| <b>Dg374</b>   | 137  | 45 | UK      | UNK  | 9  | 29 | animal | 26029 |            | Pearson et al. (2015)                |
| <b>Dg379</b>   | 137  | 45 | UK      | UNK  | 9  | 29 | animal | 26037 |            | Pearson et al. (2015)                |
| <b>Dg382</b>   | 137  | 45 | UK      | UNK  | 9  | 29 | animal | 26055 |            | Pearson et al. (2015)                |
| <b>OXC7113</b> | 538  | 45 | UK      | 2012 | 9  | 29 | human  | 21195 |            | Oxfordshire Human Surveillance Study |
| <b>OXC7331</b> | 137  | 45 | UK      | 2012 | 9  | 29 | human  | 22369 |            | Oxfordshire Human Surveillance Study |
| <b>OXC7780</b> | 137  | 45 | UK      | 2013 | 9  | 29 | human  | 24587 |            | Oxfordshire Human Surveillance Study |
| <b>OXC7782</b> | 137  | 45 | UK      | 2013 | 9  | 29 | human  | 24589 |            | Oxfordshire Human Surveillance Study |
| <b>OXC8100</b> | 137  | 45 | UK      | 2013 | 9  | 29 | human  | 25528 |            | Oxfordshire Human Surveillance Study |
| <b>OXC7752</b> | 538  | 45 | UK      | 2013 | 9  | 29 | human  | 24986 |            | Oxfordshire Human Surveillance Study |
| <b>49-1S</b>   | 45   | 45 | Finland | 2003 | 9  | 32 | animal | 46113 | PRJEB15115 | This study                           |
| <b>49-15S</b>  | 45   | 45 | Finland | 2004 | 9  | 32 | animal | 46114 | PRJEB15115 | This study                           |
| <b>OXC7169</b> | 45   | 45 | UK      | 2012 | 9  | 32 | human  | 21250 |            | Oxfordshire Human Surveillance Study |
| <b>OXC8170</b> | 45   | 45 | UK      | 2013 | 9  | 32 | human  | 25547 |            | Oxfordshire Human Surveillance Study |
| <b>2176-08</b> | 11   | 45 | Finland | 2008 | 10 | 33 | animal | 48026 |            | Llarena et al. (2015)                |
| <b>3217-08</b> | 11   | 45 | Finland | 2008 | 10 | 33 | animal | 47995 |            | Llarena et al. (2015)                |
| <b>6539-12</b> | 11   | 45 | Finland | 2012 | 10 | 33 | animal | 45968 |            | Llarena et al. (2015)                |
| <b>6542-12</b> | 11   | 45 | Finland | 2012 | 10 | 33 | animal | 6542  |            | Llarena et al. (2015)                |
| <b>6613-12</b> | 11   | 45 | Finland | 2012 | 10 | 33 | animal | 45970 |            | Llarena et al. (2015)                |
| <b>6673-12</b> | 11   | 45 | Finland | 2012 | 10 | 33 | animal | 45971 |            | Llarena et al. (2015)                |
| <b>6675-12</b> | 11   | 45 | Finland | 2012 | 10 | 33 | animal | 45972 |            | Llarena et al. (2015)                |
| <b>6677-12</b> | 11   | 45 | Finland | 2012 | 10 | 33 | animal | 45973 |            | Llarena et al. (2015)                |
| <b>6678-12</b> | 11   | 45 | Finland | 2012 | 10 | 33 | animal | 45974 |            | Llarena et al. (2015)                |

|                |      |    |         |      |    |    |        |       |            |                                      |
|----------------|------|----|---------|------|----|----|--------|-------|------------|--------------------------------------|
| <b>6679-12</b> | 11   | 45 | Finland | 2012 | 10 | 33 | animal | 45975 |            | Llarena et al. (2015)                |
| <b>6680-12</b> | 11   | 45 | Finland | 2012 | 10 | 33 | animal | 45976 |            | Llarena et al. (2015)                |
| <b>6970-12</b> | 11   | 45 | Finland | 2012 | 10 | 33 | animal | 45977 |            | Llarena et al. (2015)                |
| <b>6971-12</b> | 11   | 45 | Finland | 2012 | 10 | 33 | animal | 45978 |            | Llarena et al. (2015)                |
| <b>J1</b>      | 11   | 45 | Finland | 2012 | 10 | 33 | human  | 45979 |            | Kovanen et al. (2014b)               |
| <b>FB6371</b>  | 11   | 45 | Finland | 1999 | 10 | 33 | animal | 46115 | PRJEB15115 | This study                           |
| <b>OXC7093</b> | 11   | 45 | UK      | 2012 | 10 | 33 | human  | 22275 |            | Oxfordshire Human Surveillance Study |
| <b>OXC8236</b> | 11   | 45 | UK      | 2013 | 10 | 33 |        | 27938 |            | Oxfordshire Human Surveillance Study |
| <b>2537-08</b> | 2219 | 45 | Finland | 2008 | 10 | 33 | animal | 47993 |            | Llarena et al. (2015)                |
| <b>OXC7026</b> | 2219 | 45 | UK      | 2012 | 10 | 33 | human  | 22213 |            | Oxfordshire Human Surveillance Study |
| <b>FI27</b>    | 11   | 45 | Estonia | 2012 | 10 | 34 | animal | 46134 | PRJEB15115 | This study                           |
| <b>OXC5164</b> | 45   | 45 | UK      | 2010 | 10 | 34 | human  | 24766 |            | Oxfordshire Human Surveillance Study |
| <b>OXC6314</b> | 45   | 45 | UK      | 2011 | 10 | 34 | human  | 16111 |            | Oxfordshire Human Surveillance Study |
| <b>OXC7812</b> | 45   | 45 | UK      | 2013 | 10 | 34 | human  | 24610 |            | Oxfordshire Human Surveillance Study |
| <b>FI17</b>    | 11   | 45 | Estonia | 2012 | 10 | 35 | animal | 46133 | PRJEB15115 | This study                           |
| <b>5288-04</b> | 45   | 45 | Finland | 2004 | 10 | 34 | animal | 47994 |            | Llarena et al. (2015)                |
| <b>OXC5090</b> | 45   | 45 | UK      | 2010 | 10 | 34 | human  | 24731 |            | Oxfordshire Human Surveillance Study |
| <b>OXC5816</b> | 45   | 45 | UK      | 2011 | 10 | 34 | human  | 23564 |            | Oxfordshire Human Surveillance Study |
| <b>OXC7788</b> | 45   | 45 | UK      | 2013 | 10 | 34 | human  | 24591 |            | Oxfordshire Human Surveillance Study |
| <b>OXC5330</b> | 1003 | 45 | UK      | 2010 | 11 | 36 | human  | 21314 |            | Oxfordshire Human Surveillance Study |
| <b>4381-04</b> | 1003 | 45 | Finland | 2004 | 11 | 37 | animal | 48022 |            | Llarena et al. (2015)                |
| <b>4384-04</b> | 1003 | 45 | Finland | 2004 | 11 | 37 | animal | 46116 | PRJEB15115 | This study                           |
| <b>4385-04</b> | 1003 | 45 | Finland | 2004 | 11 | 37 | animal | 46117 | PRJEB15115 | This study                           |
| <b>Dg345</b>   | 7256 | 45 | UK      | UNK  | 12 | 38 | animal | 26009 |            | Pearson et al. (2015)                |
| <b>Dg294</b>   | 7256 | 45 | UK      | UNK  | 12 | 38 | animal | 26022 |            | Pearson et al. (2015)                |

|             |    |    |        |      |  |  |        |  |  |  |
|-------------|----|----|--------|------|--|--|--------|--|--|--|
| Dataset two |    |    |        |      |  |  |        |  |  |  |
| <b>CA1</b>  | 45 | 45 | Canada | 2005 |  |  | animal |  |  |  |
| <b>CA2</b>  | 45 | 45 | Canada | 2006 |  |  | human  |  |  |  |
| <b>CA3</b>  | 45 | 45 | Canada | 2006 |  |  | human  |  |  |  |
| <b>CA4</b>  | 45 | 45 | Canada | 2006 |  |  | animal |  |  |  |
| <b>CA6</b>  | 45 | 45 | Canada | 2007 |  |  | human  |  |  |  |
| <b>CA7</b>  | 45 | 45 | Canada | 2007 |  |  | human  |  |  |  |
| <b>CA8</b>  | 45 | 45 | Canada | 2007 |  |  | human  |  |  |  |
| <b>CA9</b>  | 45 | 45 | Canada | 2007 |  |  | human  |  |  |  |
| <b>CA11</b> | 45 | 45 | Canada | 2007 |  |  | animal |  |  |  |
| <b>CA12</b> | 45 | 45 | Canada | 2007 |  |  | animal |  |  |  |
| <b>CA13</b> | 45 | 45 | Canada | 2007 |  |  | animal |  |  |  |
| <b>CA14</b> | 45 | 45 | Canada | 2008 |  |  | human  |  |  |  |
| <b>CA15</b> | 45 | 45 | Canada | 2008 |  |  | human  |  |  |  |
| <b>CA16</b> | 45 | 45 | Canada | 2008 |  |  | human  |  |  |  |
| <b>CA17</b> | 45 | 45 | Canada | 2008 |  |  | human  |  |  |  |
| <b>CA18</b> | 45 | 45 | Canada | 2008 |  |  | human  |  |  |  |
| <b>CA19</b> | 45 | 45 | Canada | 2008 |  |  | human  |  |  |  |
| <b>CA20</b> | 45 | 45 | Canada | 2008 |  |  | human  |  |  |  |
| <b>CA21</b> | 45 | 45 | Canada | 2008 |  |  | human  |  |  |  |
| <b>CA22</b> | 45 | 45 | Canada | 2008 |  |  | human  |  |  |  |
| <b>CA23</b> | 45 | 45 | Canada | 2008 |  |  | human  |  |  |  |
| <b>CA24</b> | 45 | 45 | Canada | 2008 |  |  | human  |  |  |  |
| <b>CA25</b> | 45 | 45 | Canada | 2008 |  |  | human  |  |  |  |
| <b>CA26</b> | 45 | 45 | Canada | 2008 |  |  | human  |  |  |  |
| <b>CA27</b> | 45 | 45 | Canada | 2008 |  |  | human  |  |  |  |
| <b>CA28</b> | 45 | 45 | Canada | 2008 |  |  | human  |  |  |  |
| <b>CA29</b> | 45 | 45 | Canada | 2008 |  |  | human  |  |  |  |
| <b>CA30</b> | 45 | 45 | Canada | 2008 |  |  | human  |  |  |  |

|              |    |    |        |      |                |  |        |       |            |            |
|--------------|----|----|--------|------|----------------|--|--------|-------|------------|------------|
| <b>CA31</b>  | 45 | 45 | Canada |      |                |  | human  |       |            |            |
| <b>CA32</b>  | 45 | 45 | Canada | 2011 |                |  | animal |       |            |            |
| <b>CA33</b>  | 45 | 45 | Canada | 2011 |                |  | animal |       |            |            |
| <b>CA34*</b> | 45 | 45 | Canada | 2011 | 4 <sup>#</sup> |  | animal | 46543 | PRJEB15115 | This study |
| <b>CA35*</b> | 45 | 45 | Canada | 2011 | 4 <sup>#</sup> |  | animal | 46544 | PRJEB15115 | This study |
| <b>CA36</b>  | 45 | 45 | Canada | 2011 |                |  | animal |       |            |            |
| <b>CA37</b>  | 45 | 45 | Canada | 2011 |                |  | animal |       |            |            |
| <b>CA38</b>  | 45 | 45 | Canada | 2011 |                |  | animal |       |            |            |
| <b>CA39</b>  | 45 | 45 | Canada | 2011 |                |  | animal |       |            |            |
| <b>CA40</b>  | 45 | 45 | Canada | 2011 |                |  | animal |       |            |            |
| <b>CA41*</b> | 45 | 45 | Canada | 2011 | 4 <sup>#</sup> |  | animal | 46542 | PRJEB15115 | This study |
| <b>CA42</b>  | 45 | 45 | Canada | 2011 |                |  | animal |       |            |            |
| <b>CA43</b>  | 45 | 45 | Canada | 2010 |                |  | animal |       |            |            |
| <b>CA44</b>  | 45 | 45 | Canada | 2010 |                |  | animal |       |            |            |
| <b>CA47</b>  | 45 | 45 | Canada | 2011 |                |  | animal |       |            |            |
| <b>CA48</b>  | 45 | 45 | Canada | 2011 |                |  | animal |       |            |            |
| <b>CA49</b>  | 45 | 45 | Canada | 2011 |                |  | animal |       |            |            |
| <b>CA50</b>  | 45 | 45 | Canada | 2011 |                |  | animal |       |            |            |
| <b>CA51</b>  | 45 | 45 | Canada | 2011 |                |  | animal |       |            |            |
| <b>CA53</b>  | 45 | 45 | Canada | 2011 |                |  | animal |       |            |            |
| <b>CA54</b>  | 45 | 45 | Canada | 2011 |                |  | animal |       |            |            |
| <b>CA56</b>  | 45 | 45 | Canada | 2005 |                |  | human  |       |            |            |
| <b>CA57</b>  | 45 | 45 | Canada | 2005 |                |  | human  |       |            |            |
| <b>CA58</b>  | 45 | 45 | Canada | 2005 |                |  | human  |       |            |            |
| <b>CA61</b>  | 45 | 45 | Canada | 2005 |                |  | human  |       |            |            |
| <b>CA62</b>  | 45 | 45 | Canada | 2005 |                |  | human  |       |            |            |
| <b>CA63</b>  | 45 | 45 | Canada | 2005 |                |  | human  |       |            |            |
| <b>CA64</b>  | 45 | 45 | Canada | 2005 |                |  | human  |       |            |            |
| <b>CA66</b>  | 45 | 45 | Canada | 2010 |                |  | animal |       |            |            |



|                     |    |    |        |      |  |                |             |       |            |            |
|---------------------|----|----|--------|------|--|----------------|-------------|-------|------------|------------|
| <b>CA67</b>         | 45 | 45 | Canada | 2004 |  |                | animal      |       |            |            |
| <b>CA68</b>         | 45 | 45 | Canada | 2004 |  |                | animal      |       |            |            |
| <b>CA69</b>         | 45 | 45 | Canada | 2004 |  |                | animal      |       |            |            |
| <b>CA71</b>         | 45 | 45 | Canada | 2004 |  |                | environment |       |            |            |
| <b>CA72</b>         | 45 | 45 | Canada | 2005 |  |                | animal      |       |            |            |
| <b>CA73</b>         | 45 | 45 | Canada | 2005 |  |                | animal      |       |            |            |
| <b>CA74</b>         | 45 | 45 | Canada | 2005 |  |                | animal      |       |            |            |
| <b>CA75</b>         | 45 | 45 | Canada | 2005 |  |                | animal      |       |            |            |
| <b>CA76</b>         | 45 | 45 | Canada | 2005 |  |                | animal      |       |            |            |
| <b>CA77</b>         | 45 | 45 | Canada | 2006 |  |                | environment |       |            |            |
| <b>CA78</b>         | 45 | 45 | Canada | 2006 |  |                | animal      |       |            |            |
| <b>CA79</b>         | 45 | 45 | Canada | 2006 |  |                | animal      |       |            |            |
| <b>CA80</b>         | 45 | 45 | Canada | 2006 |  |                | animal      |       |            |            |
| <b>CA81</b>         | 45 | 45 | Canada | 2006 |  |                | animal      |       |            |            |
| <b>CA82</b>         | 45 | 45 | Canada | 2006 |  |                | animal      |       |            |            |
| <b>CA83</b>         | 45 | 45 | Canada | 2006 |  |                | animal      |       |            |            |
| <b>CA84</b>         | 45 | 45 | Canada | 2006 |  |                | environment |       |            |            |
| <b>CA86</b>         | 45 | 45 | Canada | 2006 |  |                | environment |       |            |            |
| <b>CA87</b>         | 45 | 45 | Canada | 2007 |  |                | environment |       |            |            |
| <b>CA88</b>         | 45 | 45 | Canada | 2009 |  |                | environment |       |            |            |
| <b>CA89</b>         | 45 | 45 | Canada | 2010 |  |                | environment |       |            |            |
| <b>CA90</b>         | 45 | 45 | Canada | 2010 |  |                | environment |       |            |            |
| <b>CA91</b>         | 45 | 45 | Canada | 2011 |  |                | environment |       |            |            |
| <b>CA95</b>         | 45 | 45 | Canada | 2011 |  |                | environment |       |            |            |
| <b>CA97</b>         | 45 | 45 | Canada | 2008 |  |                | environment |       |            |            |
| <b>2015TE25798*</b> | 45 | 45 | Italy  | 2015 |  |                | animal      | 46124 | PRJEB15115 | This study |
| <b>2015TE25090*</b> | 45 | 45 | Italy  | 2015 |  | 4 <sup>#</sup> | animal      | 46125 | PRJEB15115 | This study |
| <b>2015TE19794*</b> | 45 | 45 | Italy  | 2015 |  | 6 <sup>#</sup> | animal      | 46126 | PRJEB15115 | This study |
| <b>2015TE18310*</b> | 45 | 45 | Italy  | 2015 |  | 6 <sup>#</sup> | animal      | 46127 | PRJEB15115 | This study |

|                     |    |    |         |      |  |                |        |       |            |            |
|---------------------|----|----|---------|------|--|----------------|--------|-------|------------|------------|
| <b>2015TE18182*</b> | 45 | 45 | Italy   | 2015 |  |                | animal | 46128 | PRJEB15115 | This study |
| <b>2015TE18181*</b> | 45 | 45 | Italy   | 2015 |  |                | animal | 46129 | PRJEB15115 | This study |
| <b>2015TE18180*</b> | 45 | 45 | Italy   | 2015 |  |                | animal | 46130 | PRJEB15115 | This study |
| <b>2015TE18178*</b> | 45 | 45 | Italy   | 2015 |  |                | animal | 46131 | PRJEB15115 | This study |
| <b>24/h/11*/**</b>  | 45 | 45 | Finland | 2011 |  |                | animal | 46118 | PRJEB15115 | This study |
| <b>38/h/11*/**</b>  | 45 | 45 | Finland | 2011 |  |                | animal | 46119 | PRJEB15115 | This study |
| <b>37/H/11*/**</b>  | 45 | 45 | Finland | 2011 |  |                | animal | 46120 | PRJEB15115 | This study |
| <b>KAI45/12*/**</b> | 45 | 45 | Finland | 2012 |  | 4 <sup>#</sup> | animal | 46121 | PRJEB15115 | This study |
| <b>KAI44/12*/**</b> | 45 | 45 | Finland | 2012 |  | 4 <sup>#</sup> | animal | 46122 | PRJEB15115 | This study |
| <b>TOK35/12*/**</b> | 45 | 45 | Finland | 2012 |  | 6 <sup>#</sup> | animal | 46123 | PRJEB15115 | This study |

Pearson, B.M., Louwen, R., van Baarlen, P., & van Vliet, A.H. (2015) Differential Distribution of Type II CRISPR-Cas Systems in Agricultural and Nonagricultural *Campylobacter coli* and *Campylobacter jejuni* Isolates Correlates with Lack of Shared Environments. *Genome Biol Evol* 7, 2663-2679

Friis, C., Wassenaar, T.M., Javed, M.A., Snipen, L., Lagesen, K., Hallin, P.F., Newell, D.G., Toszeghy, M., Ridley, A., Manning, G. & Ussery, D.W. (2010) Genomic Characterization of *Campylobacter jejuni* Strain M1. *PLoS ONE* 5, e12253

Kovanen, S., Kivistö, R., Rossi, M., Schott, T., Karkkainen, U.M., Tuuminen, T. et al. (2014b). Multilocus sequence typing (MLST) and whole-genome MLST of *Campylobacter jejuni* isolates from human infections in three districts during a seasonal peak in Finland. *J Clin Microbiol*, 52:4147-4154.

Kovanen, S., Kivistö, R., Llarena, A.K., Zhang, J., Kärkkäinen, U., Tuuminen, T. et al. (2016). Tracing isolates from domestic human *Campylobacter jejuni* infections to animal slaughter batches and swimming water using whole-genome multilocus sequence typing. *Int J Food Microbiol*. 2016; e-pub ahead of print 20 Mar 2016, doi: 10.1016/j.ijfoodmicro.2016.03.009

Llarena, A.K., Huneau, A., Hakkinen, M., Hänninen, M.L. (2015). Predominant *Campylobacter jejuni* sequence types persist in Finnish chicken production. *PLoS one*, 10(2):e0116585. doi: 10.1371/journal.pone.0116585.ena

Revez, J., Llarena, A.K., Schott, T., Kuusi, M., Hakkinen, M., Kivistö, R., et al. (2014). Genome analysis of *Campylobacter jejuni* strains isolated from a waterborne outbreak. *BMC genomics*, 15 doi: 10.1186/1471-2164-15-768.

Zhang, J., Halkilahti, J., Hänninen, M.L., Rossi, M. (2015). Refinement of whole-genome multilocus sequence typing analysis by addressing gene paralogy. *J Clin Microbiol* 53:1765-1767.

\* Genomes included in Dataset two

\*\* Genomes of migrating wild bird isolates

# BAPS group level 1 with which these isolated clustered together with in the Parsnp analysis

Supplementary Table S1: Overview over the 437 *C. jejuni* genomes used in this study. The assembled genomes and raw reads of the isolates sequenced in this study were deposited to the PubMLST database (<http://www.PubMLST.org/>) under their respective id-numbers and under the ENA project number PRJEB15115.

| Clade    | Group# | hierBAPS L1 (L2*) | ST##                                                                         |
|----------|--------|-------------------|------------------------------------------------------------------------------|
| <i>a</i> | 1      | 12                | 7256                                                                         |
|          | 2      | 1(3*)             | 334 <sup>&amp;&amp;</sup> , 4791 <sup>&amp;&amp;</sup>                       |
|          | 3      | 1, 8              | 7259 <sup>&amp;</sup>                                                        |
| <i>b</i> | 1      | 2, 9              | 137, 230 <sup>&amp;&amp;</sup> , 538, 583, 2109 <sup>&amp;&amp;</sup> , 6017 |
|          | 2      | 9(32*)            | 45 <sup>&amp;</sup> , 137                                                    |
|          | 3      | 10                | 11, 45 <sup>&amp;</sup> , 2219                                               |
|          | 4      | 4                 | 45 <sup>&amp;</sup>                                                          |
|          | 5      | 7(22*)            | 45 <sup>&amp;</sup> , 1701, 2197                                             |
|          | 6      | 5, 6, 11, 7       | 25, 45 <sup>&amp;</sup> , 233, 845, 1003, 1326, 6886, 7008                   |

# Group defined with bootstrap supporting value  $\geq 80\%$  as showed in figure S1A

## Singletons are marked in italics

& STs divided between different BAPS groups on L1

&& Monophyletic STs forming ST-specific populations on L1 and L2

Supplementary Table S2 Overview of cladogistic relationship between STs and population structure. BAPS level two is indicated by an asterix.

S1a)

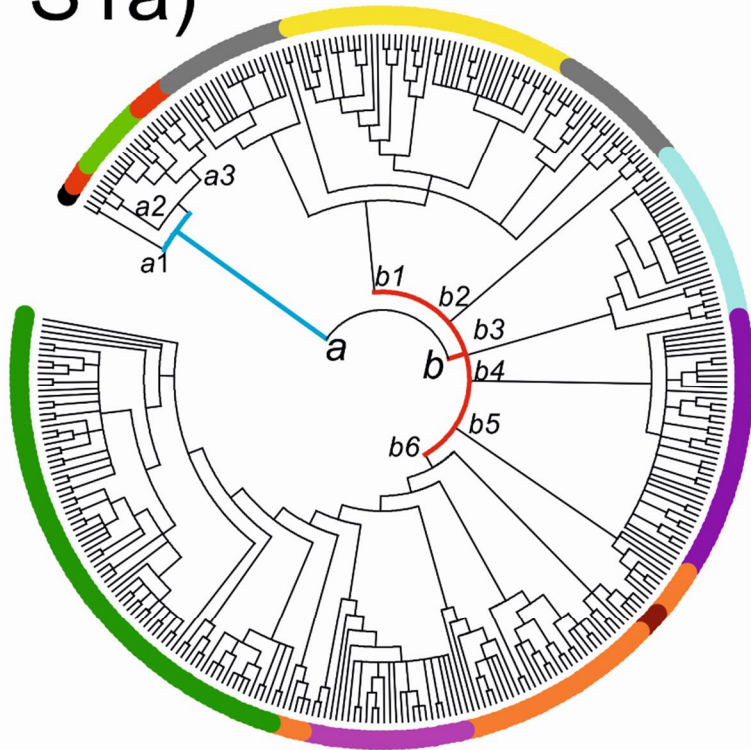

S1b)

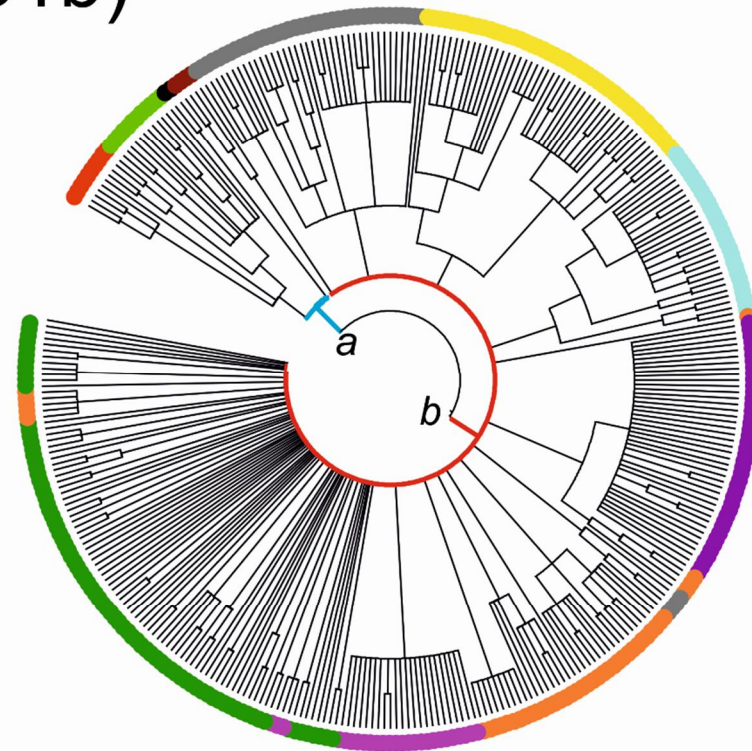

Supplementary Figure S1 Cladogram of core (S1a) and accessory (S1b) genome using >80% bootstrap values. Clades *a* and *b* are marked as red and blue branches respectively and BAPS level 1 clustering is depicted with colors on the outer ring: black; BAPS 12 red; BAPS 1 light green; 8 grey; BAPS 9 yellow; BAPS 2 turquoise; BAPS 10 purple; BAPS 4 orange; BAPS 7 brick red; BAPS 11 pink; BAPS 5 dark green; BAPS 6. A) The clade numbers are indicated with letter *a* or *b* designating clade and numbers as close to the divergent node as possible. Two of the six monophyletic groups on the *b*-clade (group *b*1 and *b*6) consisted of several BAPS populations and while group *b*1 contained strains from multiple STs (ST-230 ST-583 ST-137 ST-2109) group *b*6 contained solely ST-45 strains belonging to BAPS 5 6 or 7 excluding singleton STs (i.e. STs represented by {less than or equal to} two isolates). The singletons were scattered through the ML tree with the exception of ST-7256

which formed its own BAPS population 12. B) Inclusion of the accessory genome disrupted the clonal frame of clade b resulting in star-shaped evolutionary relationship.
